# Supplementary material
Source: PubMed Central journal article supplement (PMC10388005)
Supplement: jmcp.2023.29.6.599_s001.pdf [file jmcp.2023.29.6.599_s001.pdf]

## **SUPPLEMENTARY MATERIALS**

### **Real-world outcomes and direct care cost before and after elexacaftor/tezacaftor/ivacaftor initiation in commercially insured members with cystic fibrosis**

Landon Z Marshall, PharmD, PhD; Rachel Espinosa, PharmD; Catherine I Starner, PharmD, BCPS; Patrick P Gleason, PharmD, BCPS

### **SUPPLEMENTARY FIGURE 1 Member Attrition**

## Supplemental Figure 1- Member Attrition

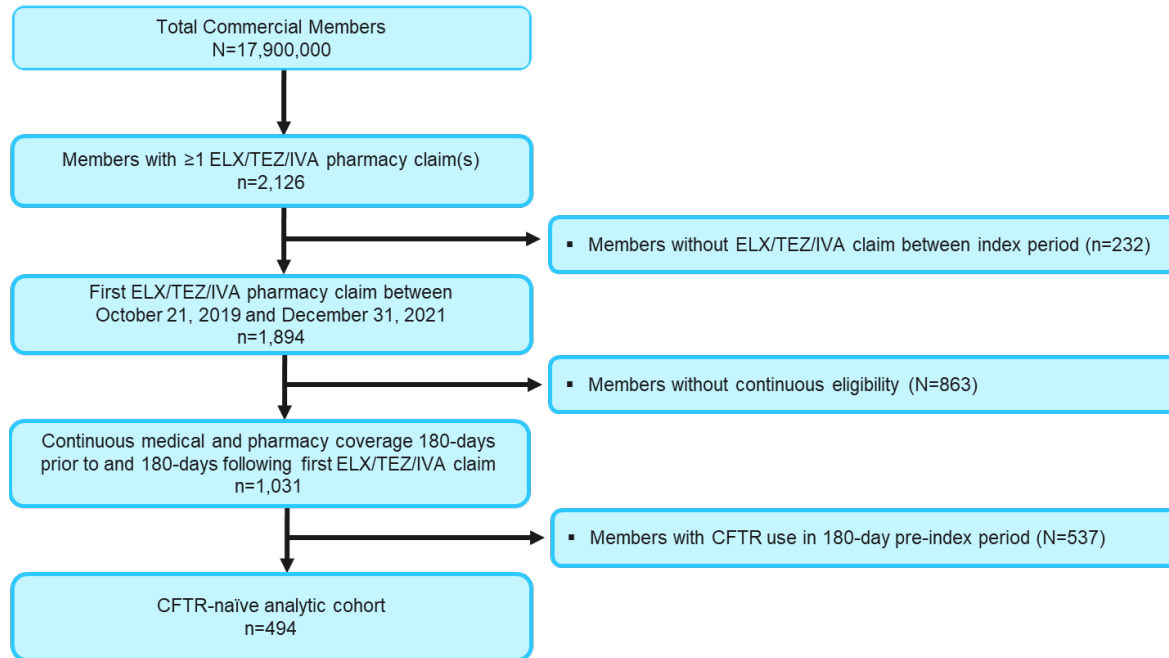

Abbreviation: CFTR, Cystic fibrosis transmembrane conductance regulator; ELX/TEZ/IVA, elexacaftor/tezacaftor/ivacaftor.

Note: CFTR-naïve status was defined as no CFTR modulator therapy pharmacy claim 180 days prior to first ELX/TEZ/IVA pharmacy claim.
